# Supplementary material for: Photocatalytic CO2 reduction catalysed by 3d transition metal complexes bearing an S2N2 ancillary ligand equipped with pyridine pendants as binding sites for Lewis acids
Source: Royal Society of Chemistry journal article supplement (doi:10.1039/d4dt02922d), 2025-01-01
Supplement: d4dt02922d1.pdf [file d4dt02922d1.pdf]

Electronic supplementary information

for

Photocatalytic CO<sub>2</sub> reduction catalysed by  
3d transition metal complexes  
bearing an S<sub>2</sub>N<sub>2</sub> ancillary ligand  
equipped with pyridine pendants  
as a binding site for Lewis acids

Tomoya Ishizuka, Asuka Hamaguchi, Yuki Hayashi, Yuto

Tsukakoshi, Hiroaki Kotani, Takuya Kawanishi and

Takahiko Kojima\*

## Experimental section.

### General.

Chemicals and solvents were purchased from commercial sources such as FUJIFILM Wako Chemicals, Tokyo Chemical Industry Co., and Sigma-Aldrich Co. and used as received unless otherwise mentioned. All synthetic reactions were performed under Ar atmosphere.  $^1\text{H}$  NMR measurements were performed on a Bruker AVANCE 400 spectrometer. ESI-TOF-MS spectra were obtained on a JEOL JMS-T100CS mass spectrometer. Gas chromatography was performed using a Shimadzu GC-2014 gas chromatograph [Ar carrier, a packed column with molecular sieves 5A (3.0 m  $\times$  3.0 mm, 60 – 80 mesh) at 353 K] equipped with a thermal conductivity detector (TCD). UV-Vis spectroscopy was carried out on a Shimadzu UV-3600 spectrophotometer at room temperature using quartz cells. bpet (**1**)<sup>1</sup>, bpet-py<sub>2</sub> (**2**)<sup>2</sup> and BIH (= 1,3-Dimethyl-2-phenyl-2,3-dihydro-1*H*-benzo[*d*]imidazole)<sup>3</sup> were synthesized according to the reported procedures.

### Synthesis.

**[Mn<sup>II</sup>(bpet)(H<sub>2</sub>O)<sub>2</sub>](ClO<sub>4</sub>)<sub>2</sub> ([1-Mn](ClO<sub>4</sub>)<sub>2</sub>).** A solution of Mn(ClO<sub>4</sub>)<sub>2</sub>·6H<sub>2</sub>O (0.87 g, 2.4 mmol) in methanol (20 mL) was added to a solution of **1** (0.67 g, 2.4 mmol) in methanol (20 mL) and the mixture was stirred for 1 d at room temperature under Ar. The mixture was evaporated and dried *in vacuo* and recrystallization of the solid obtained from acetonitrile/ethyl acetate gave colourless crystals of [2-Mn](ClO<sub>4</sub>)<sub>2</sub> (1.09 g, 1.93 mmol, 80% yield). Anal. Calcd. for C<sub>14</sub>H<sub>16</sub>N<sub>2</sub>S<sub>2</sub>Mn·2ClO<sub>4</sub>·1.5H<sub>2</sub>O: C 30.17, H 3.44, N 5.03. Found: C 29.92, H 3.21, N 4.84. ESI-TOF-MS (CH<sub>3</sub>CN): *m/z* = 429.92 (calcd. for [1-Mn – 2H<sub>2</sub>O + ClO<sub>4</sub>]<sup>+</sup>: 429.96).

**[Fe<sup>II</sup>(bpet)(CH<sub>3</sub>CN)<sub>2</sub>](ClO<sub>4</sub>)<sub>2</sub> ([1-Fe](ClO<sub>4</sub>)<sub>2</sub>).** A solution of Fe(ClO<sub>4</sub>)<sub>2</sub>·6H<sub>2</sub>O (0.54 g, 1.5 mmol) in methanol (10 mL) was added to a solution of **1** (0.41 g, 1.5 mmol) in methanol (20 mL) and the mixture was stirred for 1 d at room temperature under Ar. The mixture was evaporated and dried *in vacuo* and recrystallization of the solid obtained from acetonitrile/ethyl acetate gave purple crystals of [1-Fe](ClO<sub>4</sub>)<sub>2</sub> (0.59 g, 0.96 mmol, 65% yield). Anal. Calcd. for C<sub>14</sub>H<sub>16</sub>N<sub>2</sub>S<sub>2</sub>Fe·2ClO<sub>4</sub>·1.5CH<sub>3</sub>CN: C 34.45, H 3.49, N 8.27. Found: C 34.35, H 3.46, N 8.38. ESI-TOF-MS (CH<sub>3</sub>CN): *m/z* = 430.91 (calcd. for [1-Fe – 2CH<sub>3</sub>CN + ClO<sub>4</sub>]<sup>+</sup>: 430.96).

**[Co<sup>II</sup>(bpet)(H<sub>2</sub>O)<sub>2</sub>](ClO<sub>4</sub>)<sub>2</sub> ([1-Co](ClO<sub>4</sub>)<sub>2</sub>).** A solution of Co(ClO<sub>4</sub>)<sub>2</sub>·6H<sub>2</sub>O (0.36 g, 1.0

mmol) in methanol (10 mL) was added to a solution of **1** (0.27 g, 1.0 mmol) in methanol (20 mL) and the mixture was stirred for 15 h at room temperature under Ar. The resultant pale red precipitate was filtered and washed with MeOH. Recrystallization of the solid obtained from acetonitrile/ethyl acetate gave red crystals of [**1-Co**](ClO<sub>4</sub>)<sub>2</sub> (0.15 g, 0.24 mmol, 25% yield). Anal. Calcd. for C<sub>14</sub>H<sub>16</sub>N<sub>2</sub>S<sub>2</sub>Co·2ClO<sub>4</sub>·1.75H<sub>2</sub>O: C 29.72, H 3.47, N 4.95. Found: C 29.57, H 3.21, N 4.98. ESI-TOF-MS (CH<sub>3</sub>CN): *m/z* = 433.89 (calcd. for [**1-Co** – 2H<sub>2</sub>O + ClO<sub>4</sub>]<sup>+</sup>: 433.96).

**[Mn(bpet-py<sub>2</sub>)(H<sub>2</sub>O)<sub>2</sub>](ClO<sub>4</sub>)<sub>2</sub> ([**2-Mn**](ClO<sub>4</sub>)<sub>2</sub>). **2** (10.4 mg, 0.023 mmol) and Mn(ClO<sub>4</sub>)<sub>2</sub>·6H<sub>2</sub>O (8.20 mg, 0.023 mmol) were mixed in CH<sub>3</sub>CN (2 mL) and the mixture was stirred at room temperature for 2 h. The solvent was evaporated and the resultant dull yellow solid was washed with ethyl acetate. Recrystallization of the solid obtained from acetonitrile/ethyl acetate gave dull yellow solid of [**2-Mn**](ClO<sub>4</sub>)<sub>2</sub> (8.86 mg, 14 μmol, 64%). Anal. Calcd. for C<sub>26</sub>H<sub>26</sub>N<sub>4</sub>S<sub>2</sub>Mn·2(ClO<sub>4</sub>)·2(H<sub>2</sub>O)·0.5CH<sub>3</sub>COOCH<sub>2</sub>CH<sub>3</sub>: C 42.43, H 4.32, N 7.07. Found: C 42.60, H 4.15, N 7.22. ESI-TOF-MS (CH<sub>3</sub>CN): *m/z* = 612.00 (sim for [**2-Mn** – 2H<sub>2</sub>O + ClO<sub>4</sub>]<sup>+</sup>: 612.05).**

**[Fe(bpet-py<sub>2</sub>)(H<sub>2</sub>O)<sub>2</sub>](ClO<sub>4</sub>)<sub>2</sub> ([**2-Fe**](ClO<sub>4</sub>)<sub>2</sub>). Solutions of **2** (20.0 mg, 0.044 mmol) in absolute ethanol (4 mL) and Fe(ClO<sub>4</sub>)<sub>2</sub>·6H<sub>2</sub>O (36.2 mg, 0.10 mmol) in absolute ethanol (8 mL) were mixed under Ar and the mixture was stirred at room temperature for 18 h. The resultant dull brown precipitate was filtered and washed with ethyl acetate. Recrystallization of the solid obtained from acetonitrile/ethyl acetate gave brown solid of [**2-Fe**](ClO<sub>4</sub>)<sub>2</sub> (6.00 mg, 9.8 μmol, 22%). Anal. Calcd. For [C<sub>26</sub>H<sub>26</sub>N<sub>4</sub>S<sub>2</sub>Fe-2H<sup>+</sup>]<sup>+</sup>·4(ClO<sub>4</sub>)·0.5CH<sub>3</sub>COOCH<sub>2</sub>CH<sub>3</sub>: C 35.09, H 3.37, N 5.85. Found: C 34.77, H 3.61, N 5.93. ESI-TOF-MS (CH<sub>3</sub>CN): *m/z* = 612.93 (sim for [**2-Fe** – 2H<sub>2</sub>O + ClO<sub>4</sub>]<sup>+</sup>: 613.04).**

**[Co(bpet-py<sub>2</sub>)(H<sub>2</sub>O)<sub>2</sub>](ClO<sub>4</sub>)<sub>2</sub> ([**2-Co**](ClO<sub>4</sub>)<sub>2</sub>). Solutions of **2** (10.5 mg, 0.023 mmol) in absolute methanol (2 mL) and Co(ClO<sub>4</sub>)<sub>2</sub>·6H<sub>2</sub>O (8.54 mg, 0.023 mmol) in absolute methanol (2 mL) were mixed under Ar and the mixture was stirred at room temperature for 18 h. The resultant dull pink precipitate was filtered and washed with ethyl acetate. Recrystallization of the solid obtained from acetonitrile/ethyl acetate gave dull pink solid [**2-Co**](ClO<sub>4</sub>)<sub>2</sub> (12.8 mg, 21 μmol, 90%). Anal. Calcd. for [C<sub>26</sub>H<sub>26</sub>N<sub>4</sub>S<sub>2</sub>Co-H<sup>+</sup>]<sup>+</sup>·3(ClO<sub>4</sub>)·3(H<sub>2</sub>O): C 36.19 H 3.78, N 6.28. Found: C 36.18, H 3.68, N 6.28. ESI-TOF-MS (CH<sub>3</sub>CN): *m/z* = 616.11 (sim for [**2-Co** – 2H<sub>2</sub>O + ClO<sub>4</sub>]<sup>+</sup>: 616.02).**

### **X-ray Crystallography.**

Single crystals of **1**-Fe·(ClO<sub>4</sub>)<sub>2</sub> and **1**-Co·(ClO<sub>4</sub>)<sub>2</sub>, suitable for X-ray crystallography was obtained by recrystallization with vapour diffusion of AcOEt into their acetonitrile solutions. The axial ligands of **1**-Co were replaced with CH<sub>3</sub>CN during recrystallization. A crystal of **1**-Mn·(ClO<sub>4</sub>)<sub>2</sub> with low quality was also obtained by recrystallization with vapour diffusion of AcOEt into its acetonitrile solution. The crystals were mounted using a mounting loop. All diffraction data were collected on a Bruker APEXII diffractometer at 120 K with a graphite-monochromated Mo K $\alpha$  radiation source ( $\lambda = 0.71073 \text{ \AA}$ ) by the  $2\theta$  scan. The structure was solved by a direct method (SIR-97)<sup>4</sup> and expanded with a differential Fourier technique. All non-hydrogen atoms were refined anisotropically and the refinement was carried out with full-matrix least-squares on  $F$ . All calculations were performed using the Yadokari-XG crystallographic software package.<sup>5</sup> Crystallographic data for **1**-Fe·(ClO<sub>4</sub>)<sub>2</sub>, **1**-Co·(ClO<sub>4</sub>)<sub>2</sub>, and **1**-Mn·(ClO<sub>4</sub>)<sub>2</sub> are summarized in Table S3. In the structure refinements, contribution of the solvent molecules of crystallization were subtracted from the diffraction pattern by the “Squeeze” program.<sup>6</sup>

## References.

1. D. Hong, Y. Tsukakoshi, H. Kotani, T. Ishizuka and T. Kojima, *J. Am. Chem. Soc.*, 2017, **139**, 6538.
2. D. Hong, T. Kawanishi, Y. Tsukakoshi, H. Kotani, T. Ishizuka and T. Kojima, *J. Am. Chem. Soc.*, 2019, **141**, 20309.
3. X.-Q. Zhu, M.-T. Zhang, A. Yu, C.-H. Wang, J.-P. Cheng, *J. Am. Chem. Soc.*, 2008, **130**, 2501.
4. G. M. Sheldrick, SIR97 and SHELX97, University of Göttingen, Göttingen (Germany), 1997.
5. C. Kabuto, S. Akine, T. Nemoto, E. Kwon, *J. Cryst. Soc. Jpn.*, 2009, **51**, 218.
6. P. V. D. Sluis, A. L. Spek, *Acta Crystallogr.*, 1990, **A46**, 194.

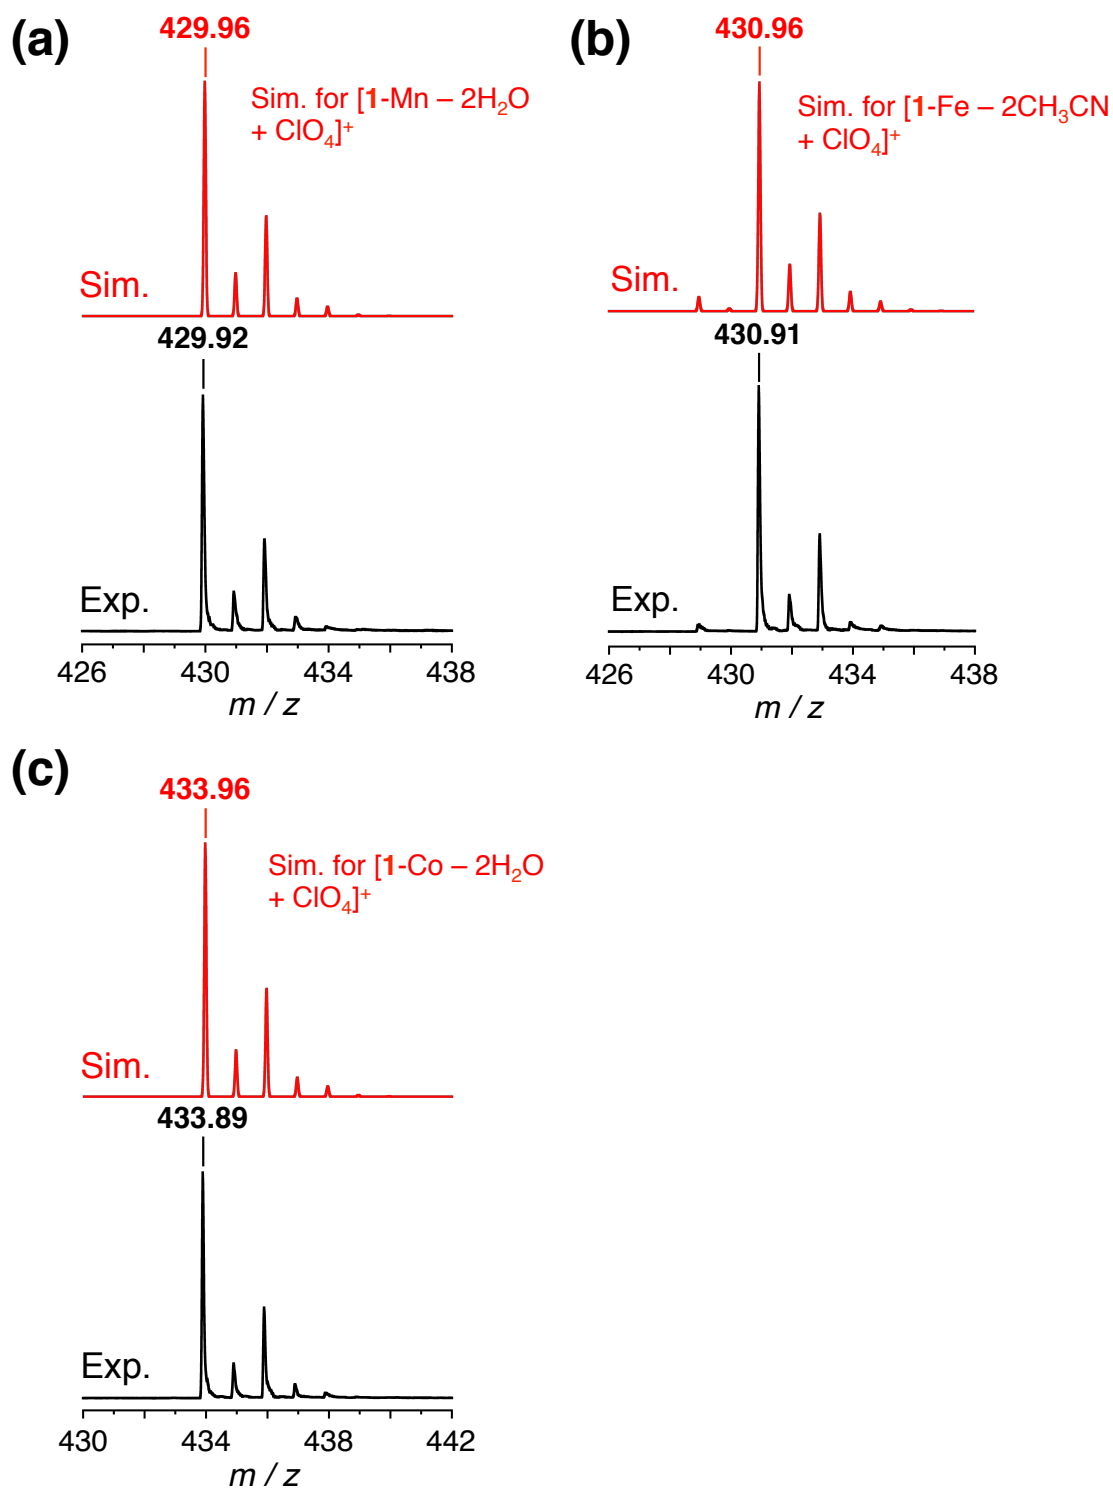

**Fig. S1.** ESI-TOF-MS spectrum of  $[1\text{-Mn}](\text{ClO}_4)_2$  (a),  $[1\text{-Fe}](\text{ClO}_4)_2$  (b), and  $[1\text{-Co}](\text{ClO}_4)_2$  (c) in  $\text{CH}_3\text{CN}$ .

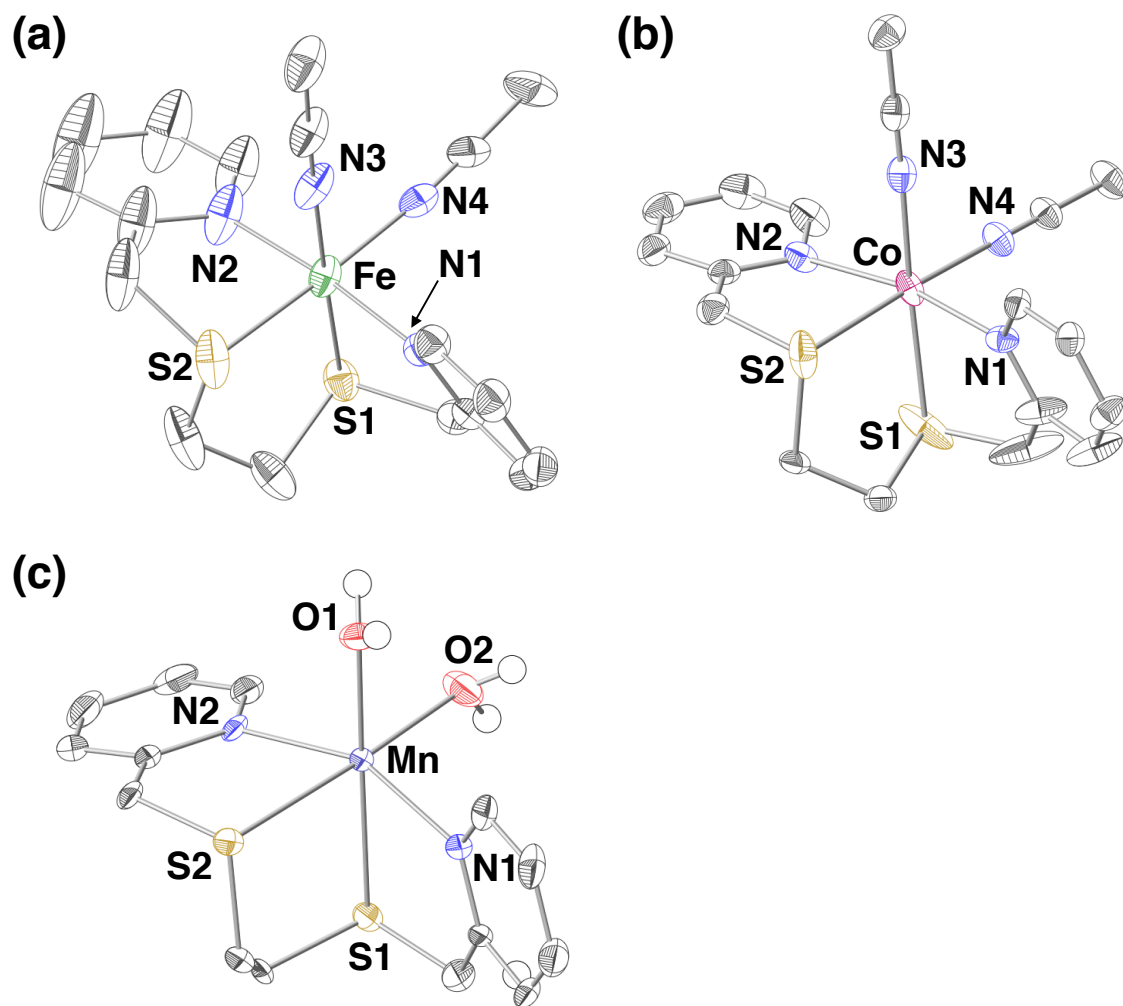

**Fig. S2.** Crystal structures of **1-Fe** (a), **1-Co** (Solv = CH<sub>3</sub>CN) (b), and **1-Mn** (c). The thermal ellipsoids are drawn at the 50% probability level.

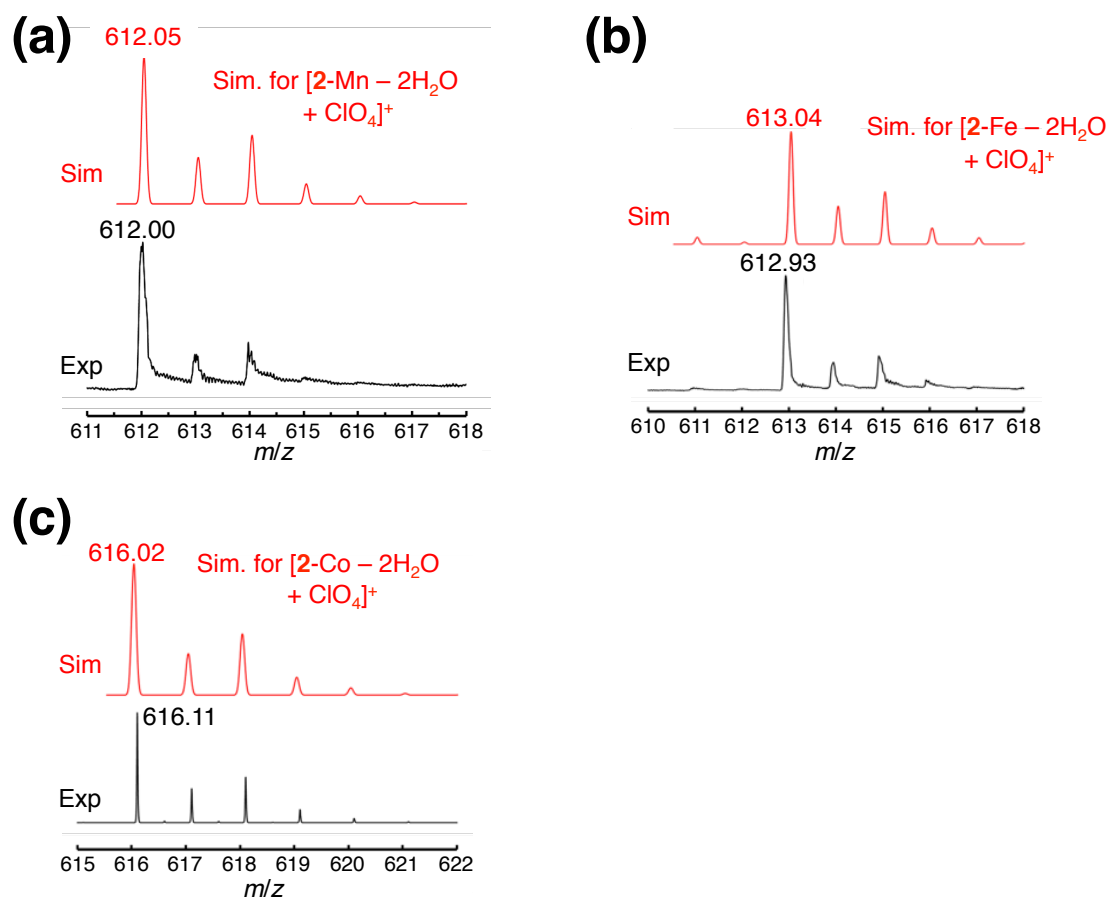

**Fig. S3.** ESI-TOF-MS spectrum of  $[2\text{-Mn}](\text{ClO}_4)_2$  (a),  $[2\text{-Fe}](\text{ClO}_4)_2$  (b), and  $[2\text{-Co}](\text{ClO}_4)_2$  (c) in  $\text{CH}_3\text{CN}$ .

**(a)**

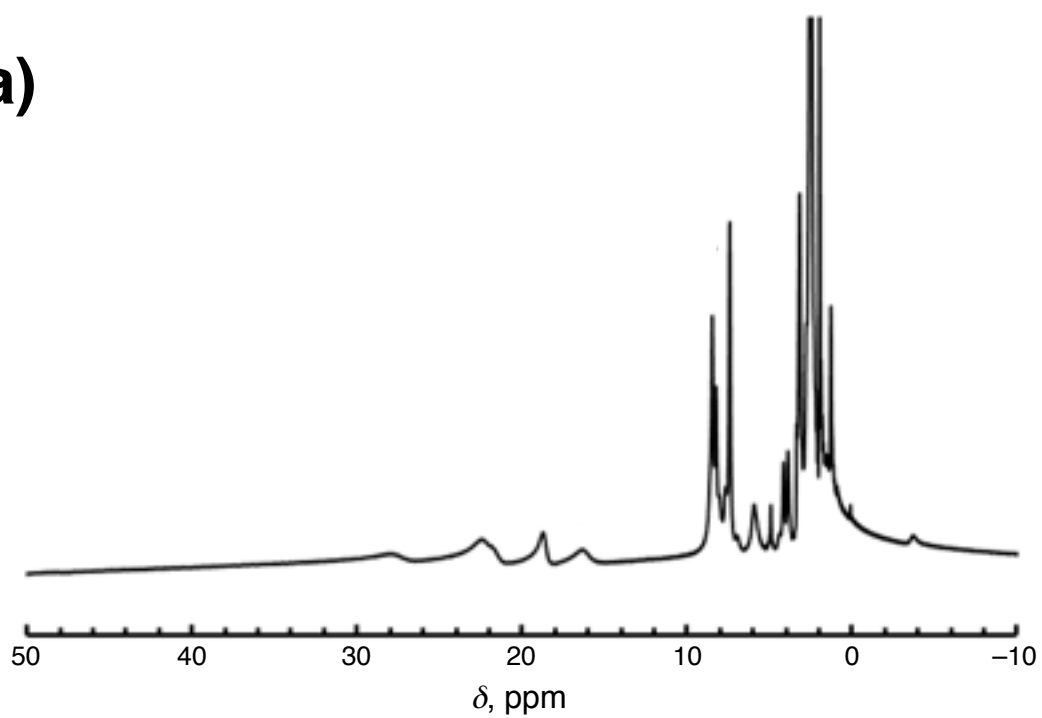

**(b)**

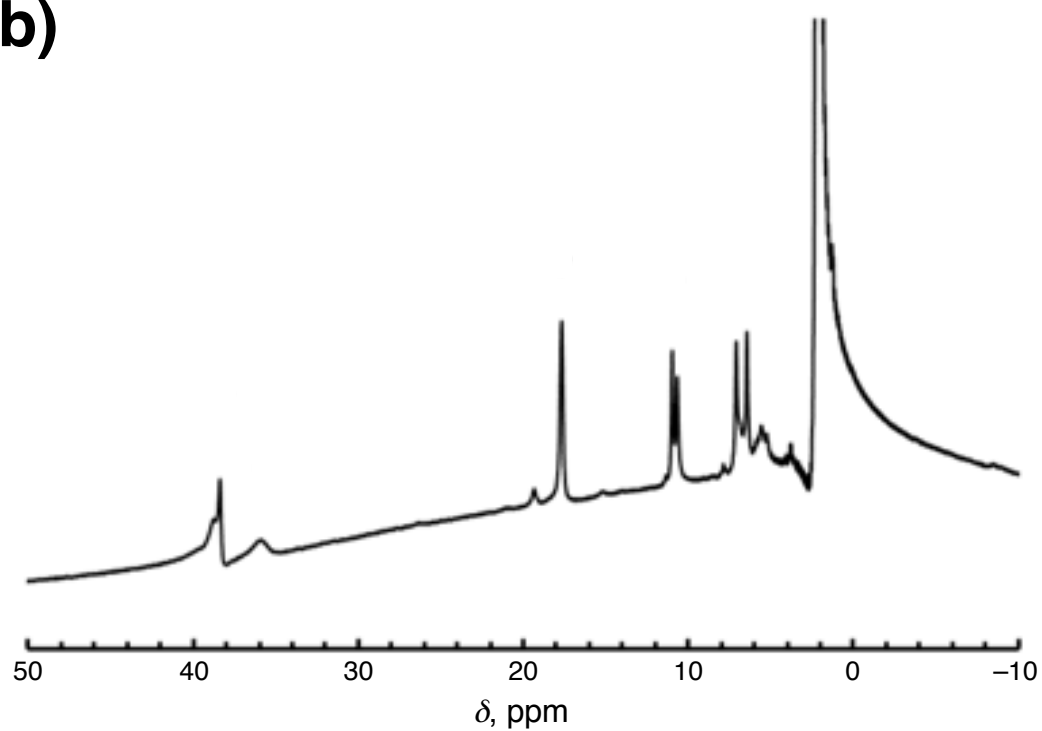

**Fig. S4.** <sup>1</sup>H NMR spectra of [2-Fe](ClO<sub>4</sub>)<sub>2</sub> (a), and [2-Co](ClO<sub>4</sub>)<sub>2</sub> (b) in CD<sub>3</sub>CN.



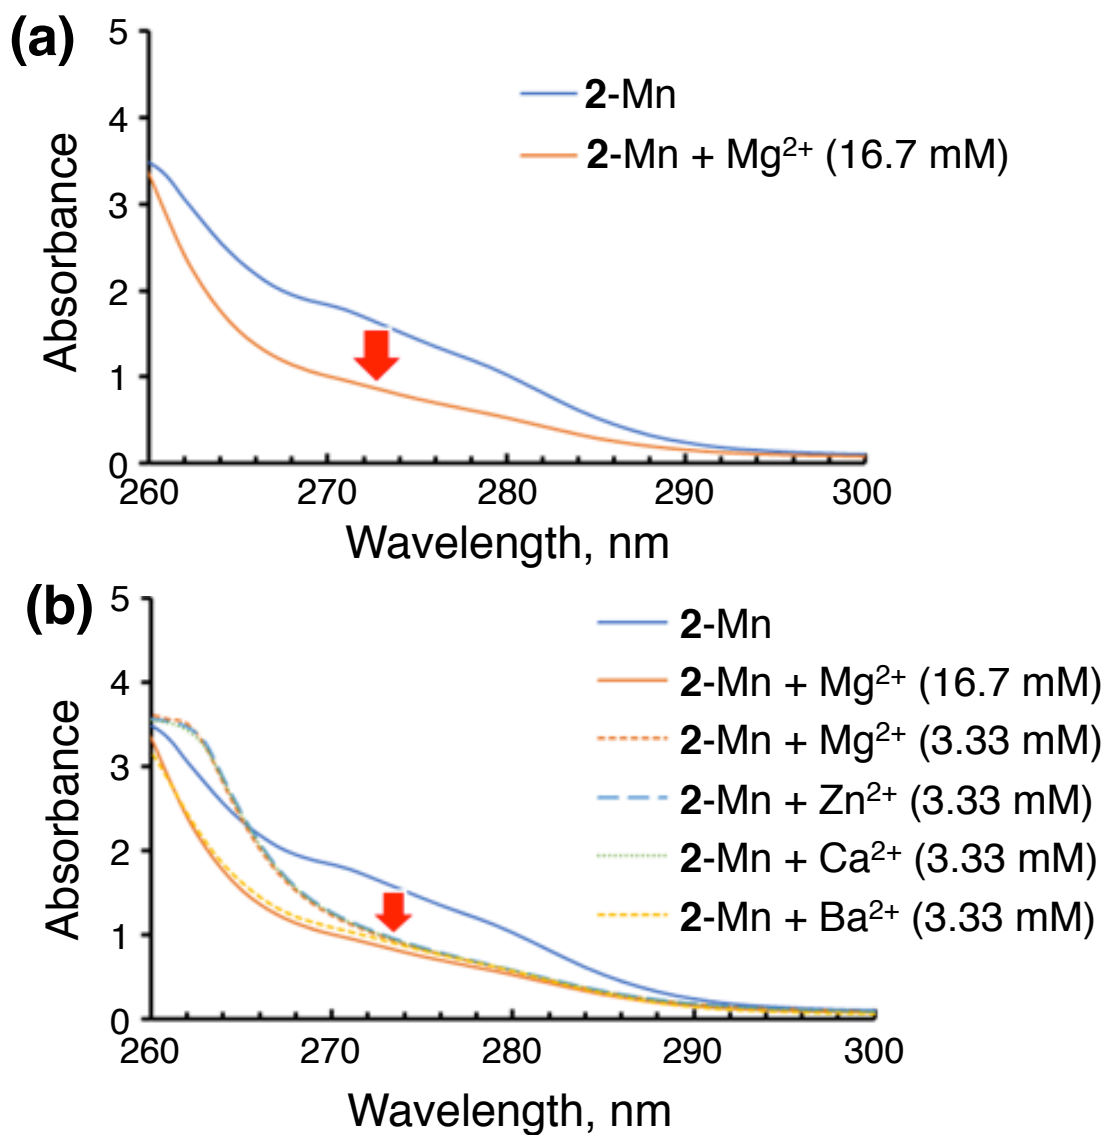

**Fig. S5.** UV-vis spectra of **2-Mn** (0.1 mM) in the absence and presence of  $\text{Mg}(\text{ClO}_4)_2$  (a) and those of **2-Mn** (0.1 mM) in the absence or presence of perchlorate salts of Lewis-acidic metal ions (b) in a DMA/ $\text{H}_2\text{O}$  (9:1, v/v) mixed solvent at room temperature.

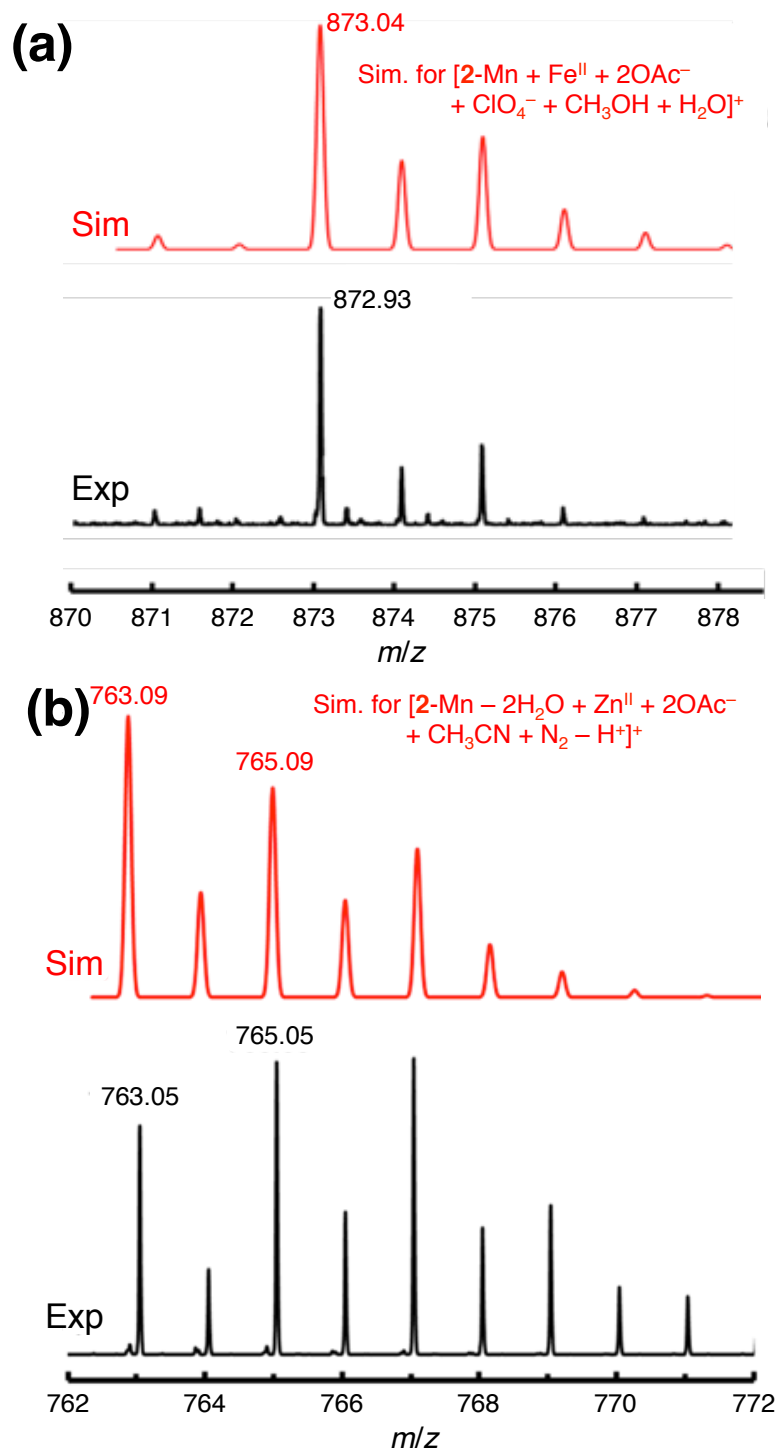

**Fig. S6.** (a) A peak cluster (black) assignable to  $\text{Fe}^{2+}$ -bound **2-Mn**, observed in the ESI-TO-MS spectrum of **2-Mn** in the presence of  $\text{Fe}(\text{OAc})_2$  (0.6 mM) in  $\text{CH}_3\text{CN}$ , and its simulation (red). (b) A peak cluster (black) assignable to  $\text{Zn}^{2+}$ -bound **2-Mn** (black), observed in the ESI-TO-MS spectrum of **2-Mn** in the presence of  $\text{Zn}(\text{OAc})_2$  (0.6 mM) in  $\text{CH}_3\text{CN}$ , and its simulation (red).

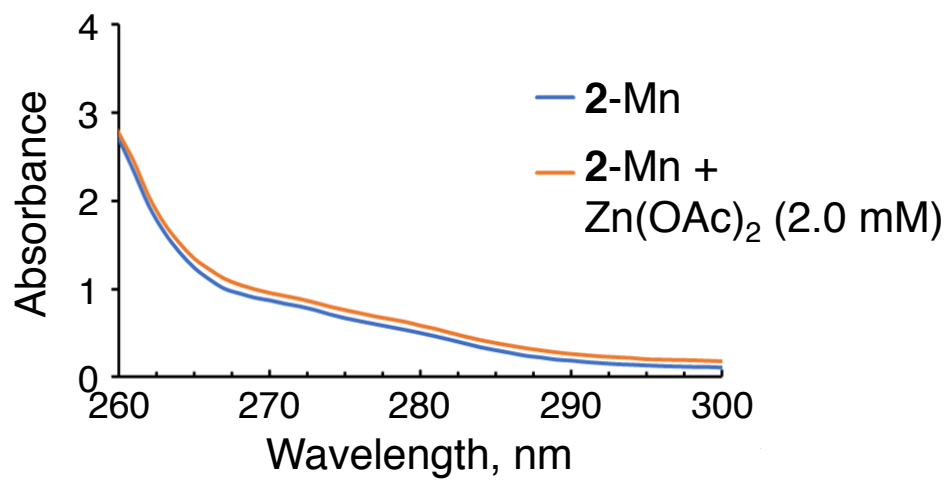

**Fig. S7.** UV-vis spectra of **2-Mn** (0.1 mM) in the absence (blue) and presence of Zn(OAc)<sub>2</sub> (2.0 mM; red) as a Lewis acid in DMA/H<sub>2</sub>O (9:1, v/v) mixed solvent at room temperature.

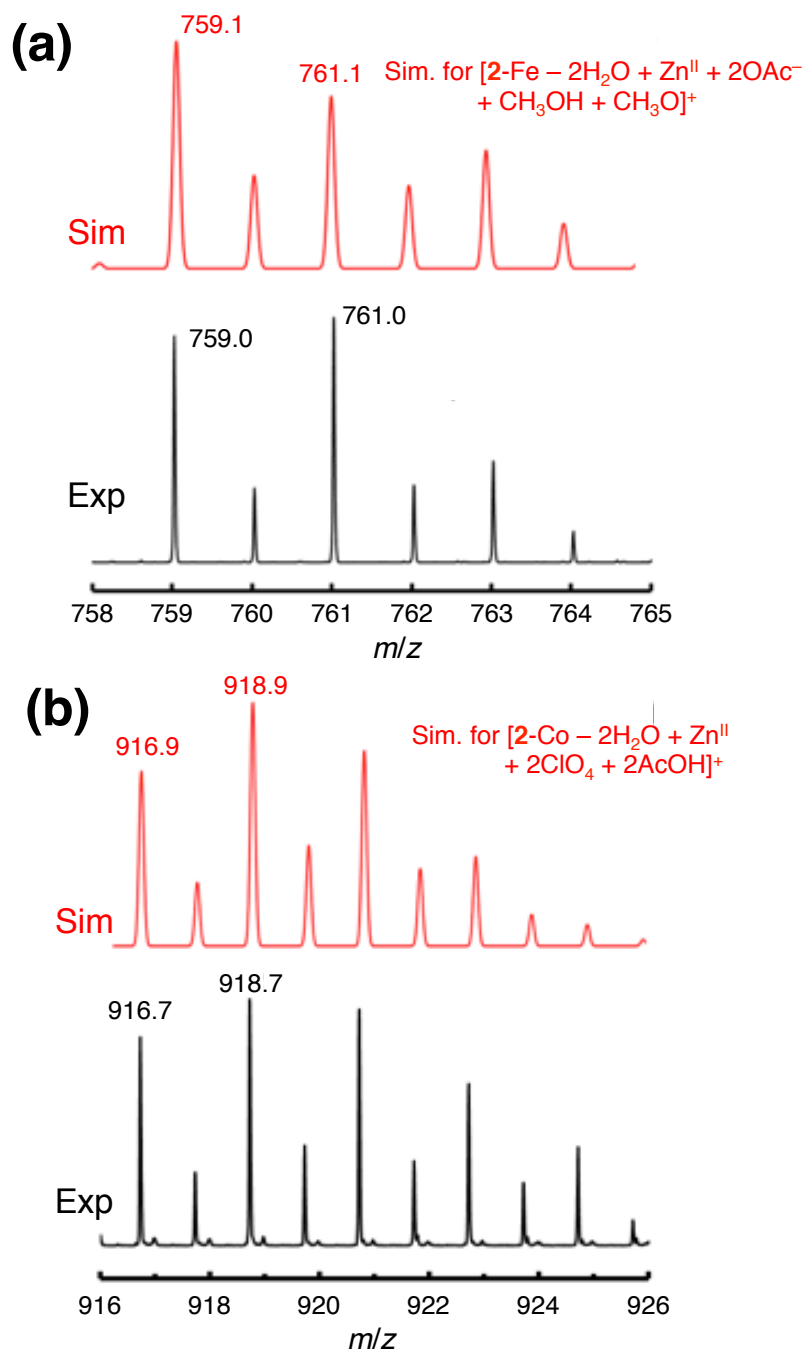

**Fig. S8.** (a) A peak cluster (black) assignable to  $\text{Zn}^{2+}$ -bound **2-Fe** (black) in the ESI-TO-MS spectrum of **2-Fe** in the presence of  $\text{Zn}(\text{OAc})_2$  (0.6 mM) in  $\text{CH}_3\text{CN}$ , and its simulation (red). (b) A peak cluster (black) assignable to  $\text{Zn}^{2+}$ -bound **2-Co** (black) in the ESI-TO-MS spectrum of **2-Co** in the presence of  $\text{Zn}(\text{OAc})_2$  (0.6 mM) in  $\text{CH}_3\text{CN}$ , and its simulation (red).

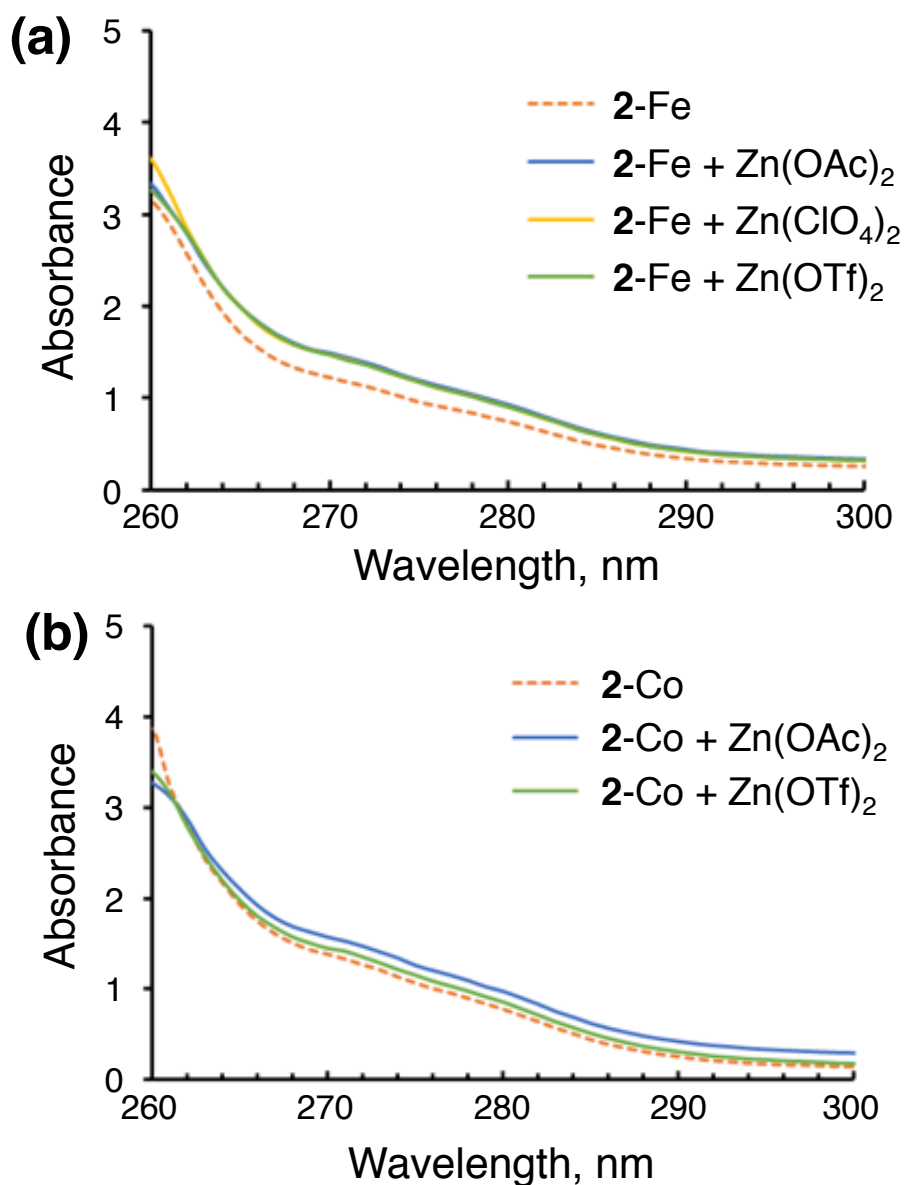

**Fig. S9.** (a) UV-vis spectral change of **2-Fe** (0.1 mM) in the absence (orange dotted line) and presence of various zinc salts (0.6 mM) as Lewis acid in a DMA/H<sub>2</sub>O (9:1, v/v) mixed solution at room temperature. (b) UV-vis spectral change of **2-Co** (0.1 mM) in the absence (orange dotted line) and presence of various zinc salts (0.6 mM) as Lewis acid in a DMA/H<sub>2</sub>O (9:1, v/v) mixed solution at room temperature.

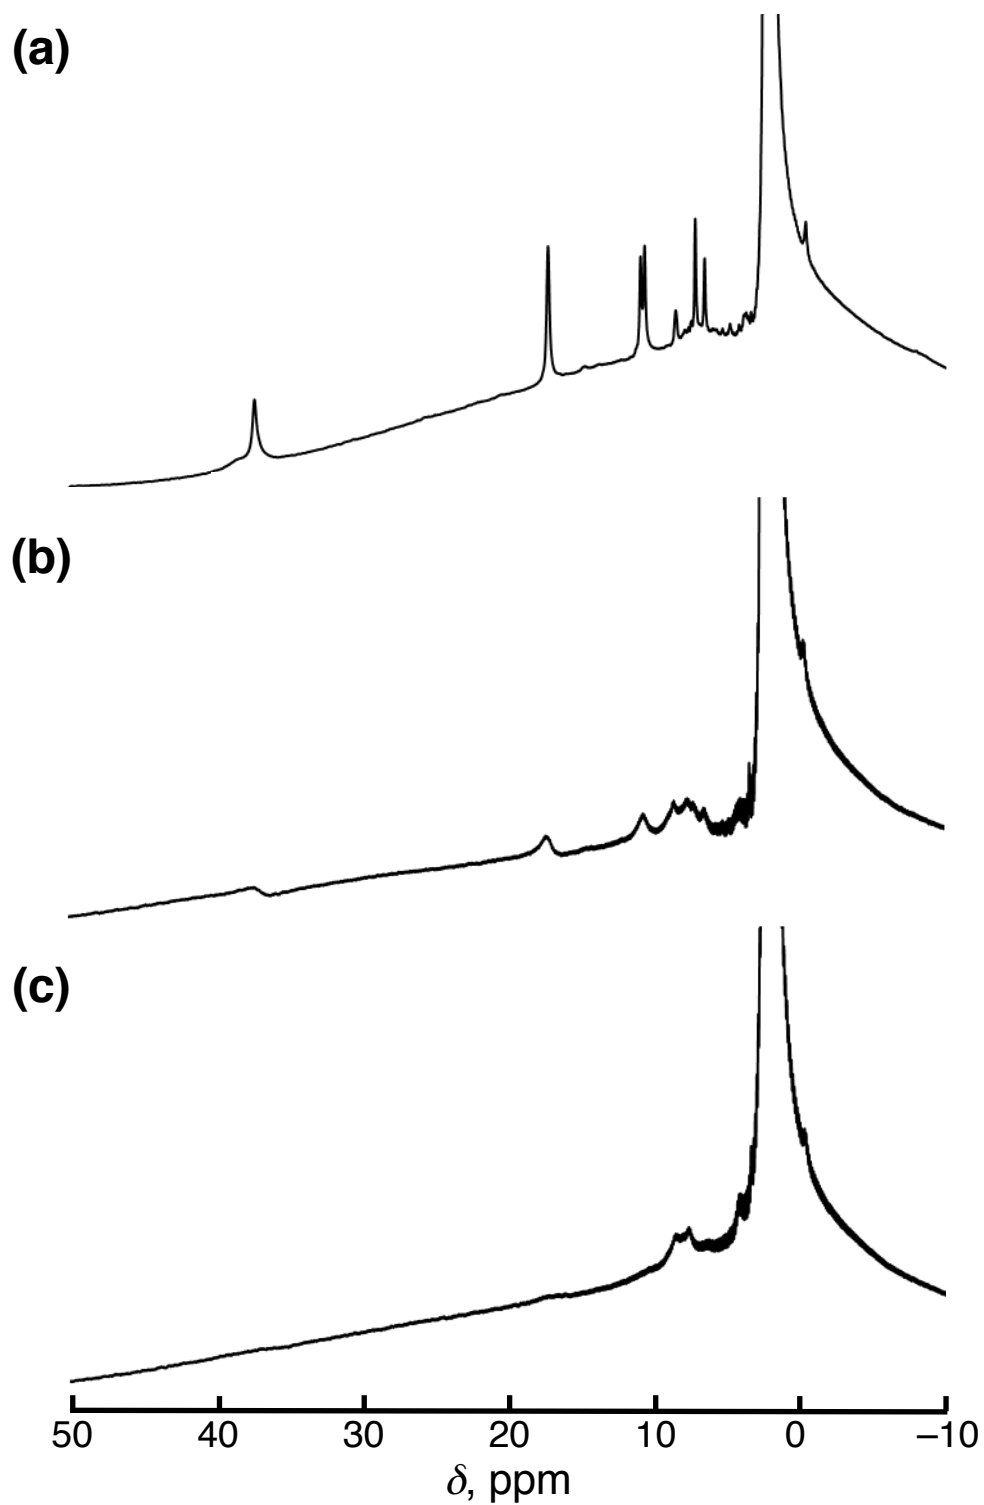

**Fig. S10.**  $^1\text{H}$  NMR spectral change of  $[\text{2-Co}](\text{ClO}_4)_2$  (0.40 mM) at 300 K in  $\text{CD}_3\text{CN}$  by addition of  $\text{Zn}(\text{OAc})_2$ :  $[\text{Zn}(\text{OAc})_2] = 0$  (a), 0.40 (b), and 1.2 mM (c).

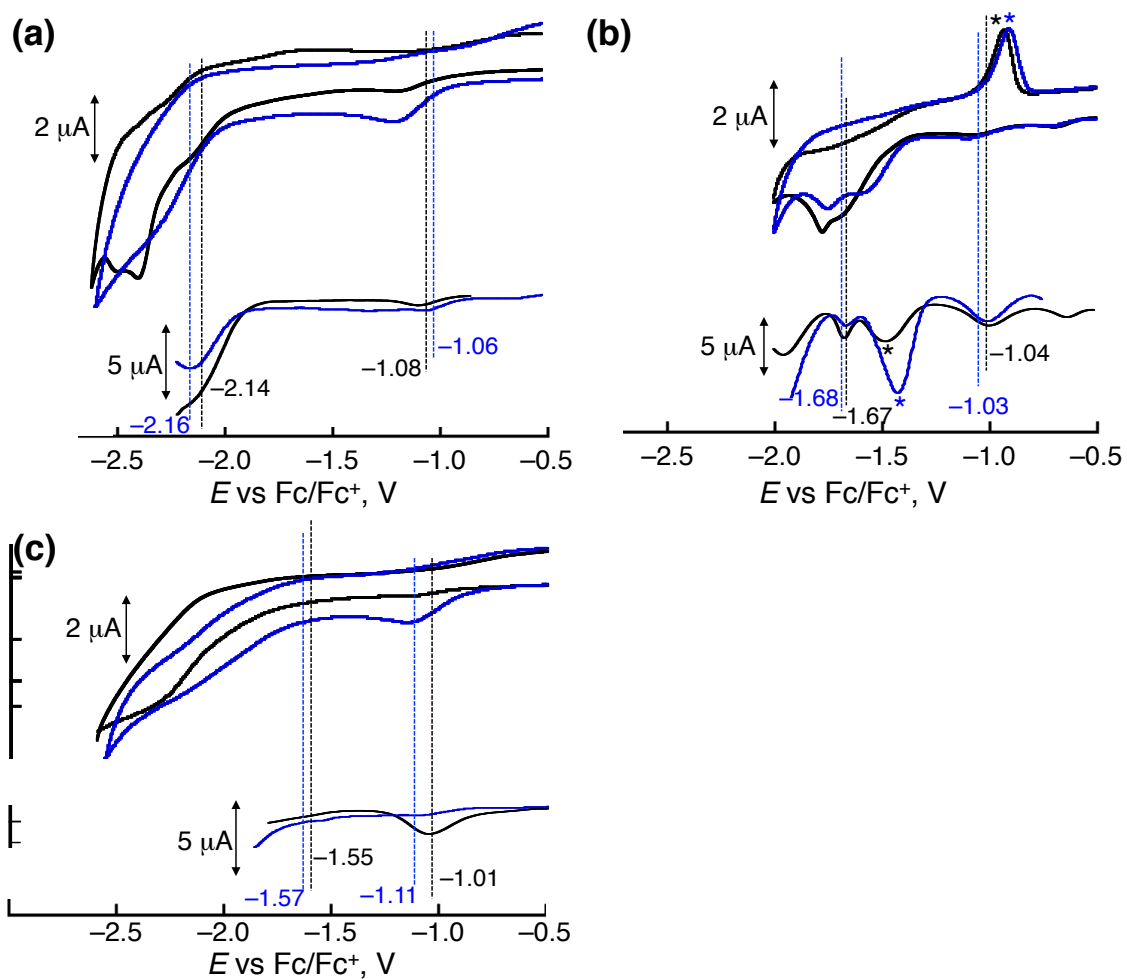

**Fig. S11.** CV and DPV traces of **2-Mn** (a), **2-Fe** (b) and **2-Co** (b) under Ar (black) and  $CO_2$  atmosphere (blue) in a DMA/ $H_2O$  (9:1, v/v) solution containing 0.10 M  $TBAPF_6$  as an electrolyte.  $[2-M] = 1.0$  mM. \* denotes an adsorption wave.

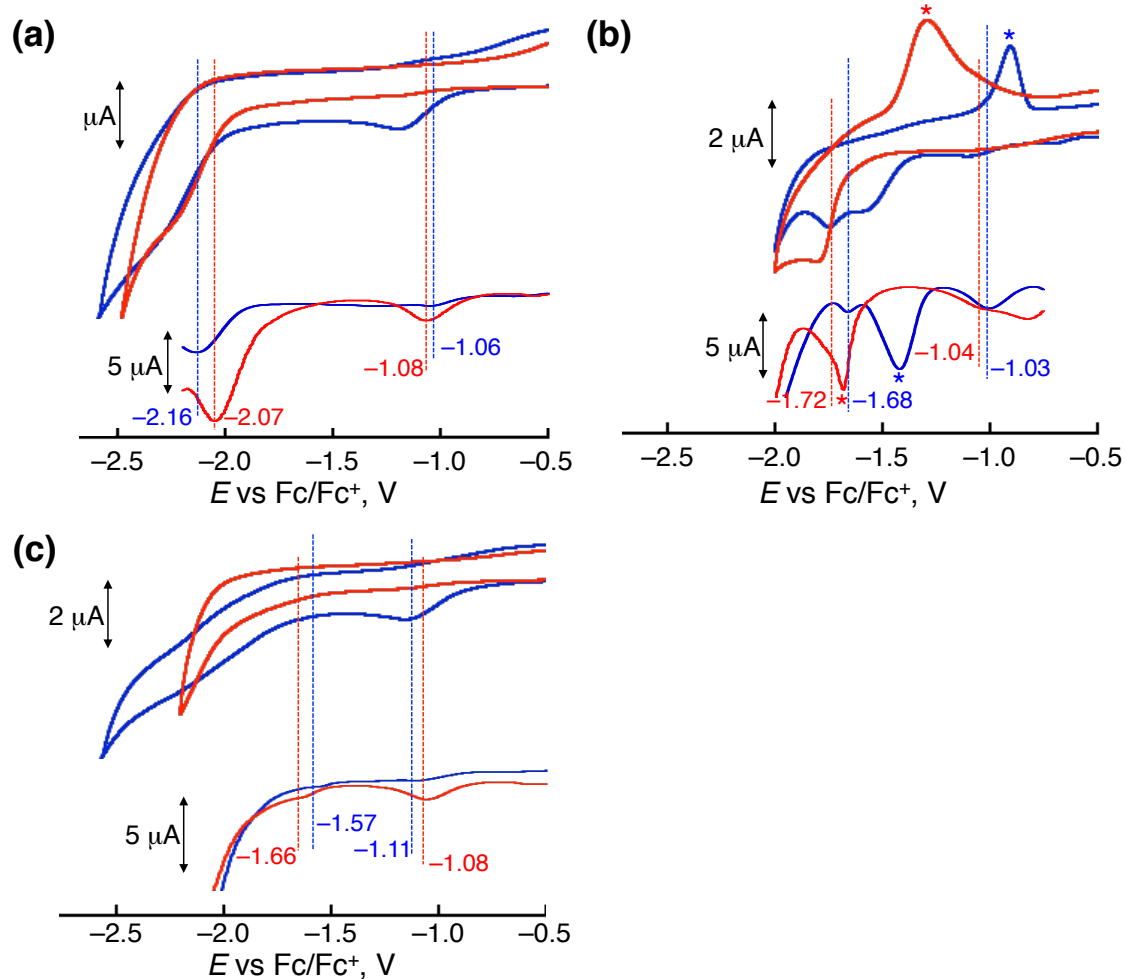

**Fig. S12.** CV and DPV traces of **2-Mn** (a), **2-Fe** (b) and **2-Co** (b) in the absence (blue) and presence (red) of Zn(OAc)<sub>2</sub> (0.6 mM) in a DMA/H<sub>2</sub>O (9:1, v/v) solution containing 0.10 M TBAPF<sub>6</sub> as an electrolyte under CO<sub>2</sub> (red) atmosphere. [2-M] = 1.0 mM. \* denotes an adsorption wave.



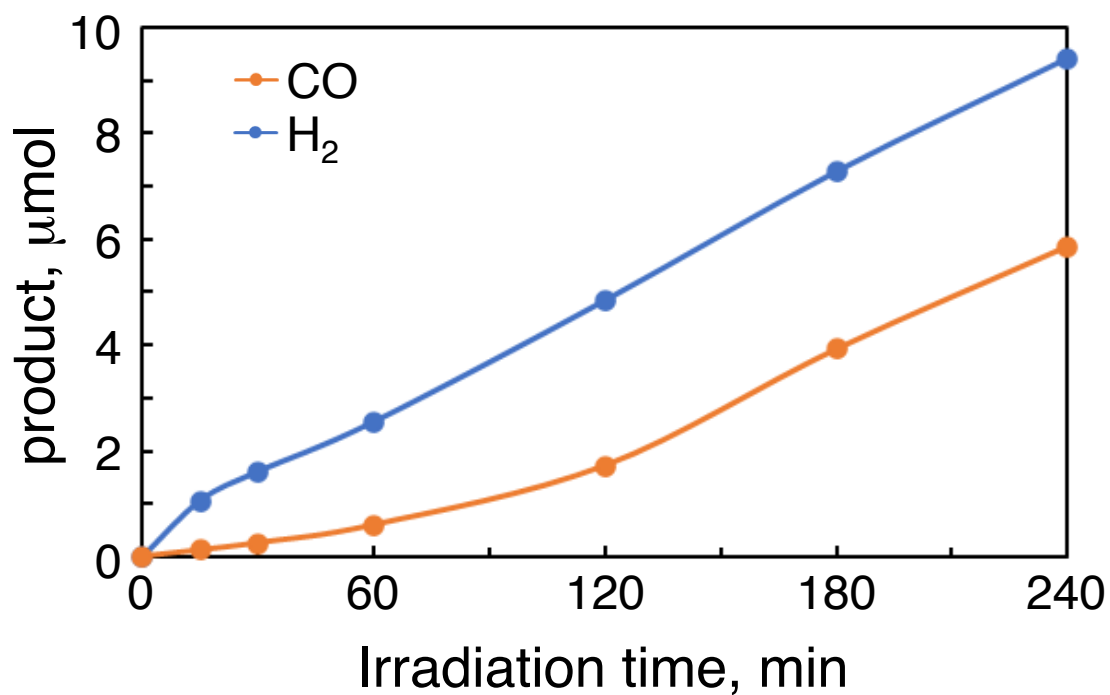

**Fig. S13.** Time courses of the CO (orange) and H<sub>2</sub> production (blue) in the photocatalytic reaction at room temperature under irradiation ( $\lambda_{\text{centre}} = 450 \text{ nm}$ ) and CO<sub>2</sub> atmosphere (1 atm) in a CH<sub>3</sub>CN/H<sub>2</sub>O (4.0 mL, 9:1 v/v) mixed solution, containing [Ru(bpy)<sub>3</sub>]<sup>2+</sup> (0.10 mM), BIH (0.10 M) and **2-Co** (30 μM).

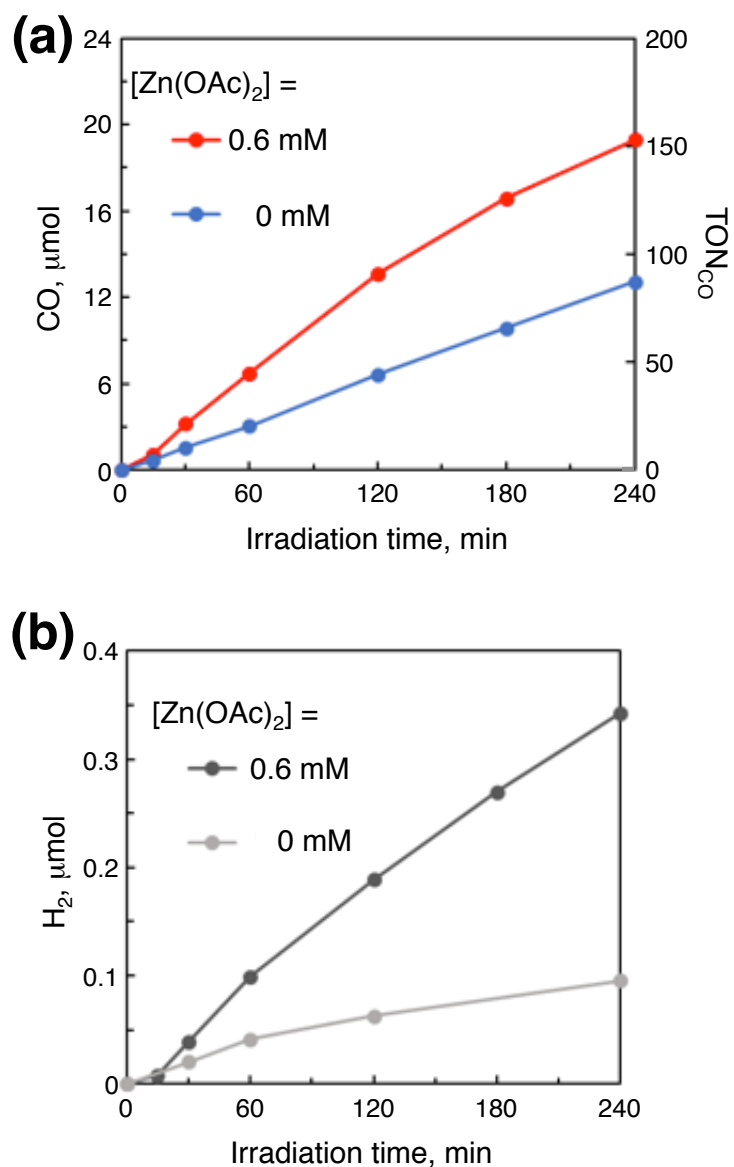

**Fig. S14.** Time courses of the CO (a) and  $\text{H}_2$  production (b) in the photocatalytic reaction at room temperature under irradiation ( $\lambda_{\text{centre}} = 450 \text{ nm}$ ) and  $\text{CO}_2$  atmosphere (1 atm) in a DMA/ $\text{H}_2\text{O}$  (4.0 mL, 9:1 v/v) mixed solution, containing  $[\text{Ru}(\text{bpy})_3]^{2+}$  (0.10 mM), BIH (0.10 M) and 2-Mn (30  $\mu\text{M}$ ) in the absence (blue and grey circles) or presence (0.6 mM; red and black circles) of  $\text{Zn}(\text{OAc})_2$ .

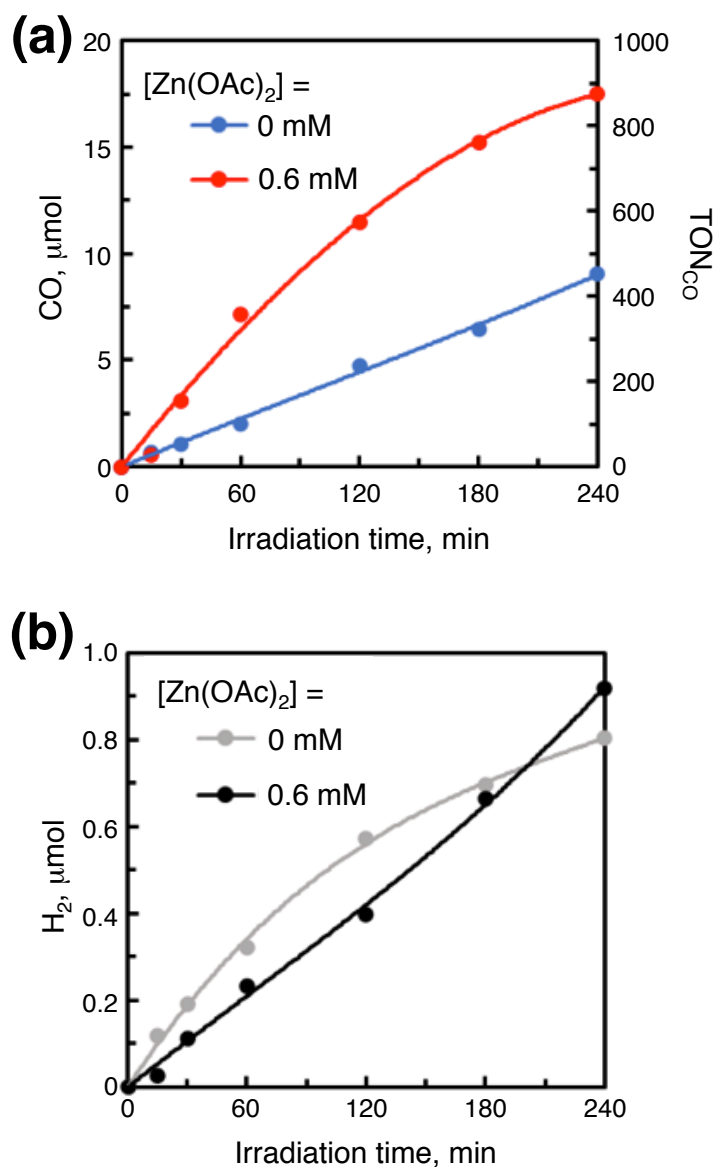

**Fig. S15.** Time courses of the CO (a) and  $\text{H}_2$  production (b) in the photocatalytic reaction at room temperature under irradiation ( $\lambda_{\text{centre}} = 450 \text{ nm}$ ) and  $\text{CO}_2$  atmosphere (1 atm) in a DMA/ $\text{H}_2\text{O}$  (4.0 mL, 9:1 v/v) mixed solution, containing  $[\text{Ru}(\text{bpy})_3]^{2+}$  (0.10 mM), BIH (0.10 M) and **2-Mn** (5  $\mu\text{M}$ ) in the absence (blue and grey circles) or presence (0.6 mM; red and black circles) of  $\text{Zn}(\text{OAc})_2$ .

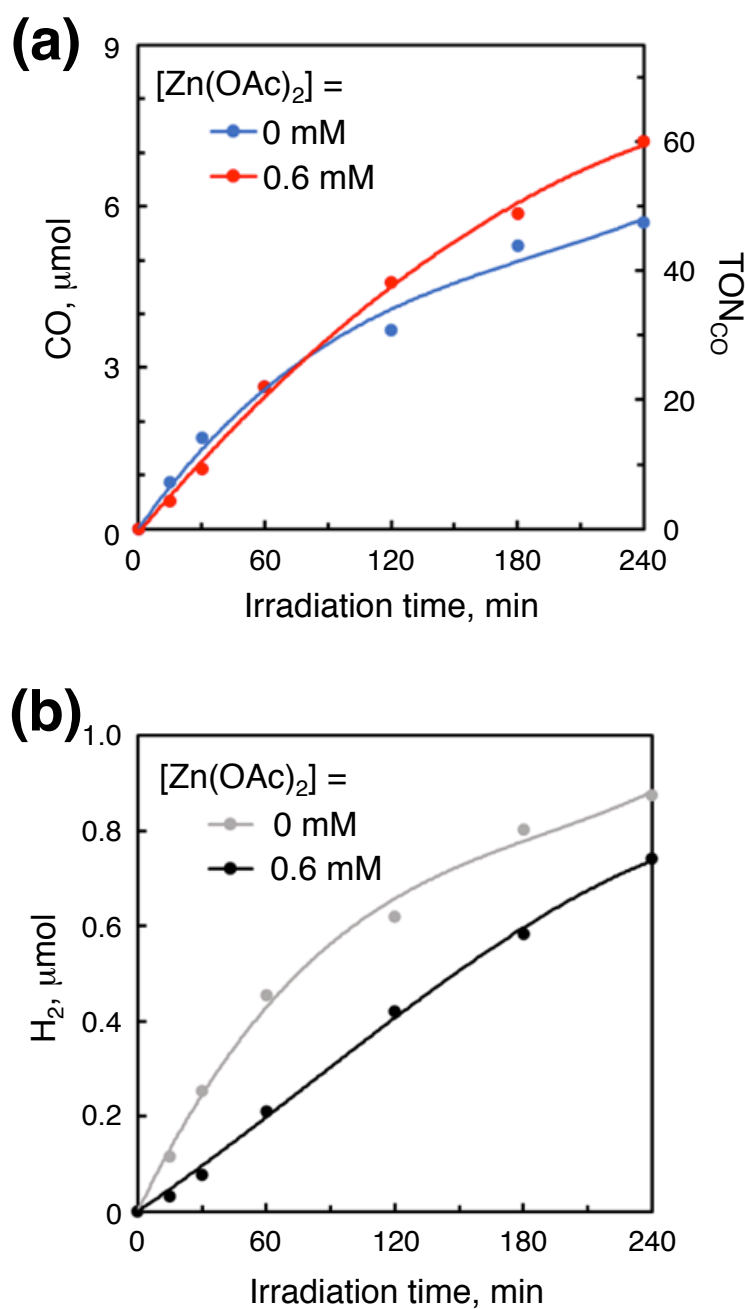

**Fig. S16.** Time courses of the CO (a) and H<sub>2</sub> production (b) in the photocatalytic reaction at room temperature under irradiation ( $\lambda_{\text{centre}} = 450 \text{ nm}$ ) and CO<sub>2</sub> atmosphere (1 atm) in a DMA/H<sub>2</sub>O (4.0 mL, 9:1 v/v) mixed solution, containing [Ru(bpy)<sub>3</sub>]<sup>2+</sup> (0.10 mM), BIH (0.10 M) and 1-Mn (30 μM) in the absence (blue and grey circles) or presence (0.6 mM; red and black circles) of Zn(OAc)<sub>2</sub>.

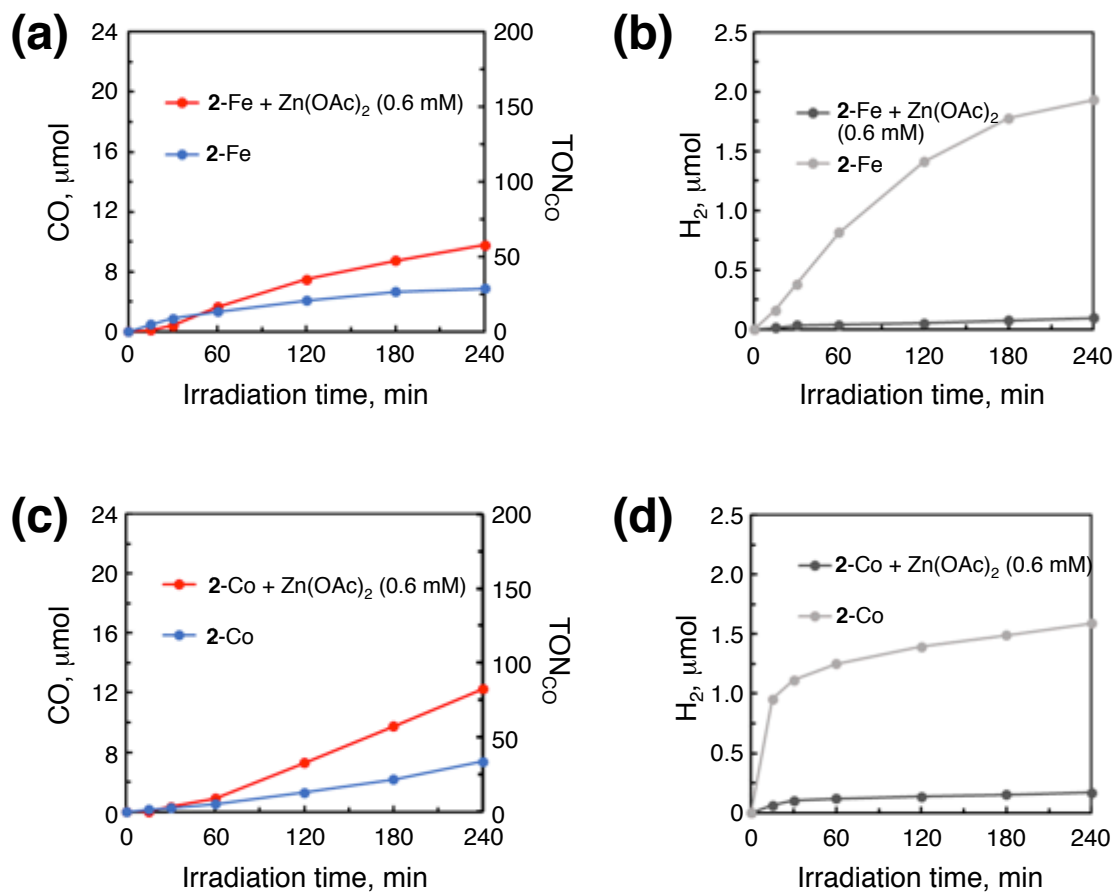

**Fig. S17.** Time courses of the CO (a and c) and H<sub>2</sub> production (b and d) in the photocatalytic reaction at room temperature under irradiation ( $\lambda_{\text{centre}} = 450 \text{ nm}$ ) and CO<sub>2</sub> atmosphere (1 atm) in a DMA/H<sub>2</sub>O (4.0 mL, 9:1 v/v) mixed solution, containing [Ru(bpy)<sub>3</sub>]<sup>2+</sup> (0.10 mM), BIH (0.10 M) and catalyst (30 μM) in the absence (blue and grey circles) or presence (0.6 mM; red and black circles) of Zn(OAc)<sub>2</sub>. Catalyst: **2-Fe** (a and b), **2-Co** (c and d).

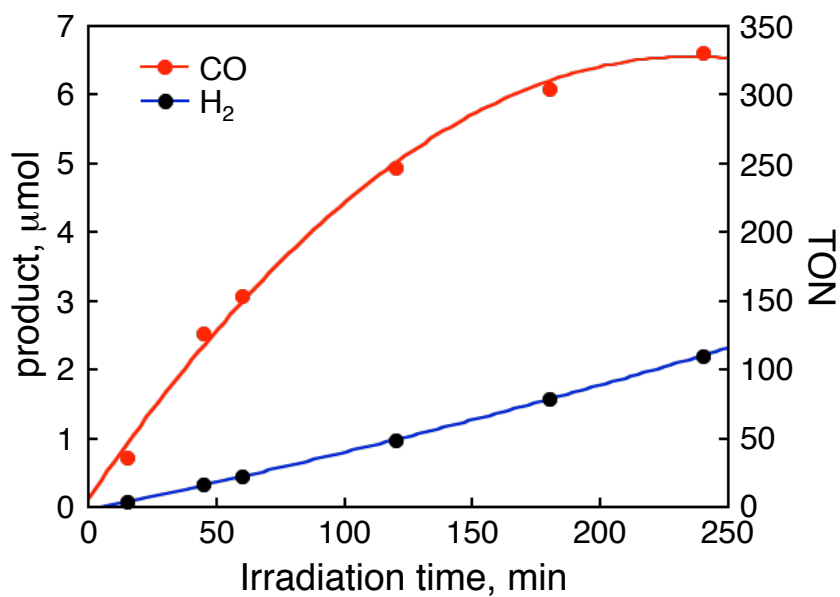

**Fig. S18.** Time courses of the CO (red) and H<sub>2</sub> production (black) in the photocatalytic reaction at room temperature under irradiation ( $\lambda_{\text{centre}} = 450$  nm) and CO<sub>2</sub> atmosphere (1 atm) in a DMA/H<sub>2</sub>O (4.0 mL, 9:1 v/v) mixed solution, containing [Ru(bpy)<sub>3</sub>]<sup>2+</sup> (0.10 mM), BIH (0.10 M) and **2-Fe** (5 μM) in the presence (0.6 mM; red and black circles) of Zn(OAc)<sub>2</sub>.

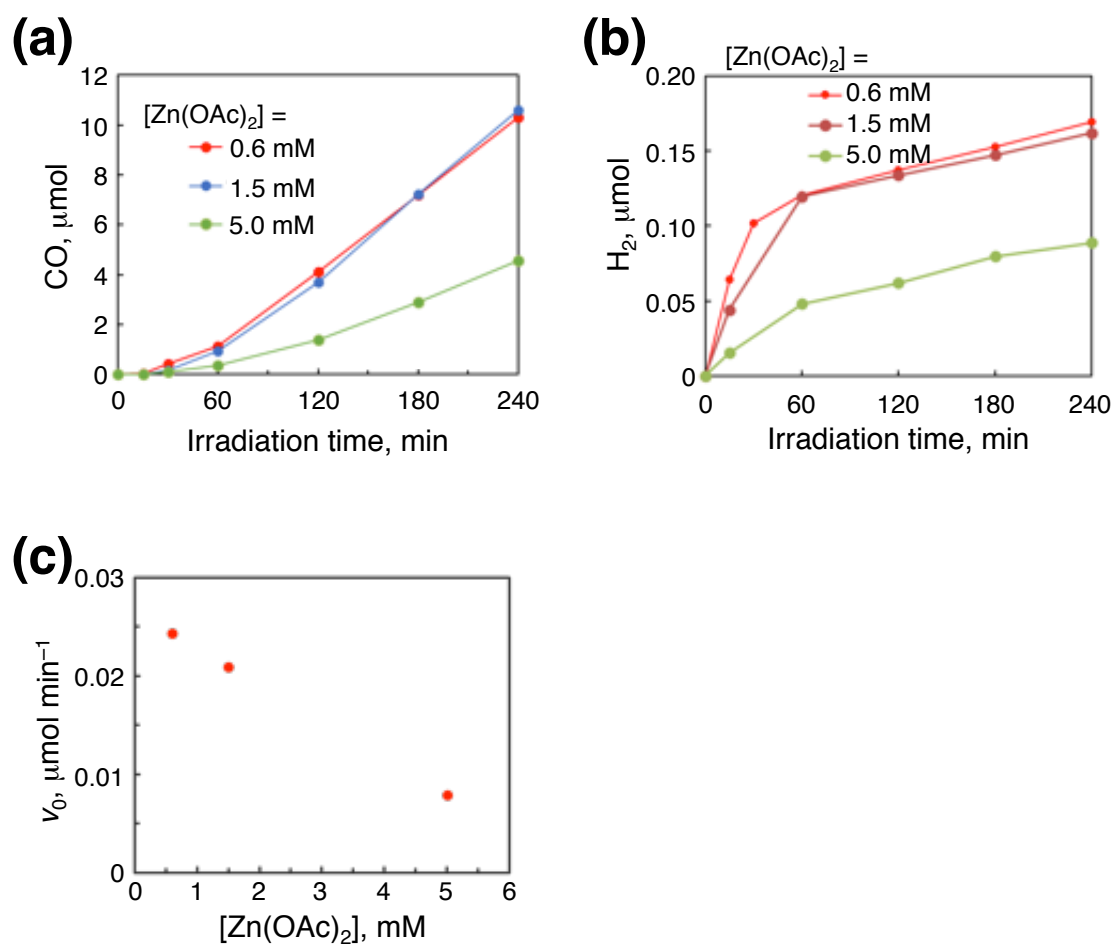

**Fig. S19.** Time sources of CO, (a) and H<sub>2</sub> evolution (b) in the photocatalytic CO<sub>2</sub> reduction under CO<sub>2</sub> atmosphere (1 atm) and irradiation ( $\lambda_{\text{center}} = 450 \text{ nm}$ ) to a DMA/H<sub>2</sub>O (4.0 mL, 9:1 v/v) mixed solution containing **2**-Co (30  $\mu\text{M}$ ), [Ru(bpy)<sub>3</sub>]<sup>2+</sup> (0.1 mM), BIH (0.1 M) and Zn(OAc)<sub>2</sub> (0.6–5.0 mM) at room temperature. (c) Dependence of the initial CO evolution rate,  $v_0$ , obtained from (a), on the concentration of Zn(OAc)<sub>2</sub>.

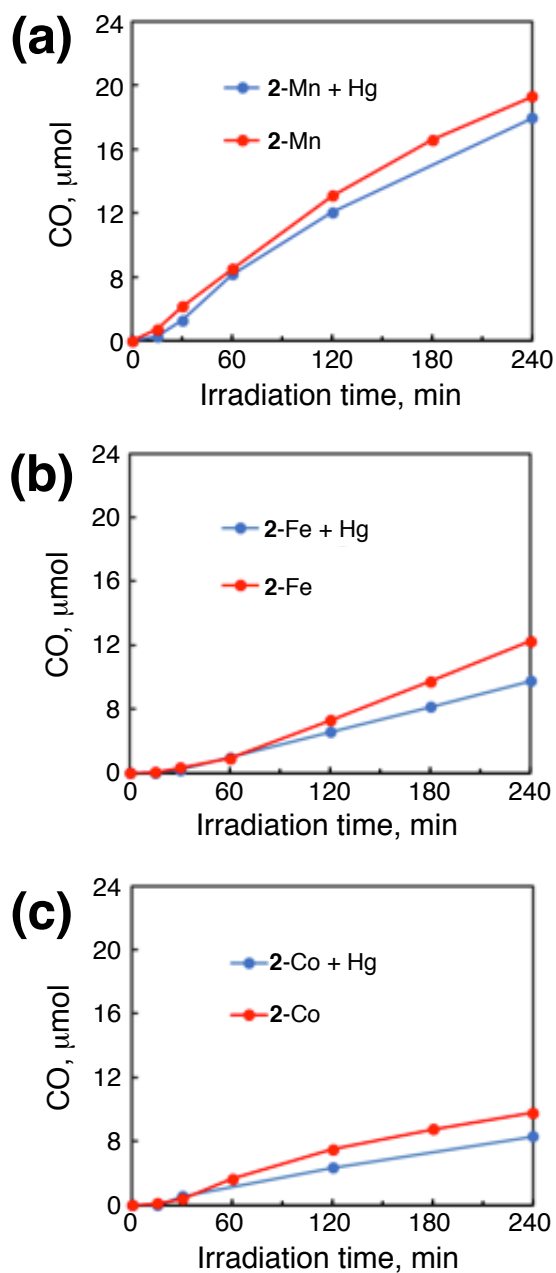

**Fig. S20.** Time courses of CO evolution in the photocatalytic reaction under  $\text{CO}_2$  atmosphere (1 atm) and photoirradiation ( $\lambda_{\text{center}} = 450 \text{ nm}$ ) in a DMA/ $\text{H}_2\text{O}$  (9:1, v/v) mixed solution containing a catalyst (30  $\mu\text{M}$ ), **2-Mn** (a), **2-Fe** (b) and **2-Co** (c),  $[\text{Ru}(\text{bpy})_3]^{2+}$  (0.1 mM), BIH (0.1 M) and  $\text{Zn}(\text{OAc})_2$  (0.6 mM) in the absence (red circles) or presence (blue circles) of Hg drops at room temperature.



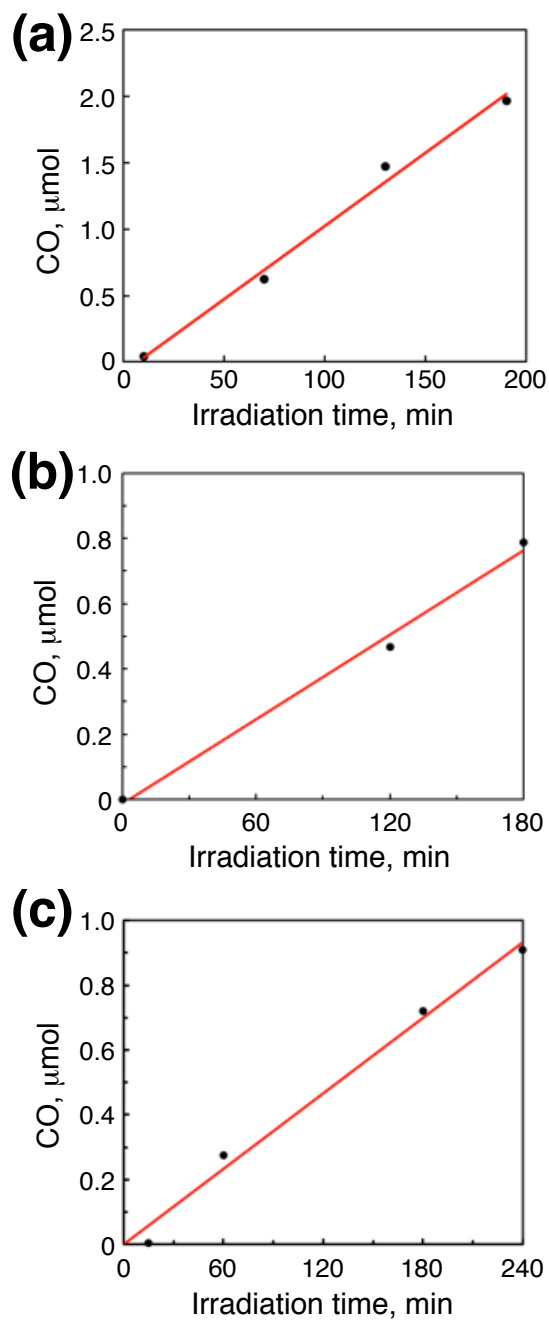

**Fig. S21.** Time course of CO evolution for the quantum yield determination by photoirradiation ( $\lambda_{\text{center}} = 450 \text{ nm}$ ) to a DMA/H<sub>2</sub>O (9:1, v/v) mixed solution containing, a catalyst, [Ru(bpy)<sub>3</sub>]<sup>2+</sup> (0.1 mM), BIH (0.1 M) and Zn(OAc)<sub>2</sub> (0.6 mM) under CO<sub>2</sub> atmosphere at room temperature. Catalyst: **2-Mn** (30 μM), (a), **2-Fe** (30 μM) (b), or **2-Co** (150 μM) (c).

**Table S1.** Selected bond distances and angles of **1-Fe**, **1-Co** (Solv = CH<sub>3</sub>CN) and **1-Mn**

| Compound    | 1-Fe <sup>a</sup> |           | 1-Co<br>(Solv = CH <sub>3</sub> CN) | 1-Mn     |
|-------------|-------------------|-----------|-------------------------------------|----------|
| M-S1        | 2.243(1)          | 2.2337(9) | 2.495(1)                            | 2.623(3) |
| M-S2        | 2.232(1)          | 2.2488(9) | 2.5003(9)                           | 2.613(3) |
| M-N1        | 2.008(3)          | 2.011(2)  | 2.119(2)                            | 2.238(6) |
| M-N2        | 2.009(2)          | 2.002(2)  | 2.124(2)                            | 2.256(5) |
| M-X1 (Solv) | 1.954(3)          | 1.949(3)  | 2.090(2)                            | 2.22(1)  |
|             | (X = N)           | (X = N)   | (X = N)                             | (X = O)  |
| M-X2 (Solv) | 1.944(3)          | 1.948(3)  | 2.115(3)                            | 2.121(7) |
|             | (X = N)           | (X = N)   | (X = N)                             | (X = O)  |
| ∠N1-M-S1    | 84.79(9)          | 85.65(8)  | 80.79(6)                            | 78.0(2)  |
| ∠S1-M-S2    | 90.61(4)          | 89.37(3)  | 86.64(3)                            | 84.97(8) |
| ∠S1-M-N2    | 85.40(7)          | 91.21(7)  | 93.98(7)                            | 84.4(2)  |
| ∠S2-M-N2    | 90.88(8)          | 85.04(7)  | 80.76(7)                            | 78.4(2)  |

<sup>a</sup> Two independent molecules of the cation moiety, [Fe<sup>II</sup>(bpet)(CH<sub>3</sub>CN)<sub>2</sub>]<sup>2+</sup>, are included in the asymmetric unit.

**Table S2.** Time course of the catalytic performance of **2-Fe** under its diluted conditions

| Irradiation time, min | CO, $\mu\text{mol}$ | H <sub>2</sub> , $\mu\text{mol}$ | Sel <sub>CO</sub> , % |
|-----------------------|---------------------|----------------------------------|-----------------------|
| 15                    | 0.7283              | 0.0694                           | 91.3                  |
| 45                    | 2.5265              | 0.3242                           | 88.6                  |
| 60                    | 3.0799              | 0.4422                           | 87.4                  |
| 120                   | 4.9412              | 0.9796                           | 83.5                  |
| 180                   | 6.0966              | 1.5668                           | 79.6                  |
| 240                   | 6.6174              | 2.2061                           | 75.0                  |

Conditions: [Ru(bpy)<sub>3</sub>]<sup>2+</sup> (0.10 mM), [BIH] = 0.10 M, [Zn(OAc)<sub>2</sub>] = 0.60 mM,  $P_{\text{CO}_2}$  = 1 atm,  $T$  = 298 K. Solvent: DMA/H<sub>2</sub>O (9:1 v/v, 4.0 mL). Light source: LED centred at 450 nm. Catalyst = **2-Fe** (5  $\mu\text{M}$ ).

**Table S3.** Crystallographic Data of **1-Fe**, **1-Co** and **1-Mn**

|                            | <b>1-Fe</b>                                                                                    | <b>1-Co</b>                                                                                    | <b>1-Mn</b>                                                                                     |
|----------------------------|------------------------------------------------------------------------------------------------|------------------------------------------------------------------------------------------------|-------------------------------------------------------------------------------------------------|
|                            |                                                                                                | (Solv = CH <sub>3</sub> CN)                                                                    |                                                                                                 |
| formula                    | C <sub>18</sub> H <sub>22</sub> N <sub>4</sub> S <sub>2</sub> FeCl <sub>2</sub> O <sub>8</sub> | C <sub>18</sub> H <sub>22</sub> N <sub>4</sub> S <sub>2</sub> CoCl <sub>2</sub> O <sub>8</sub> | C <sub>14</sub> H <sub>20</sub> N <sub>2</sub> S <sub>2</sub> O <sub>10</sub> MnCl <sub>2</sub> |
| formula wt                 | 613.26                                                                                         | 616.34                                                                                         | 566.28                                                                                          |
| cryst syst                 | triclinic                                                                                      | monoclinic                                                                                     | triclinic                                                                                       |
| space group                | <i>P</i> $\bar{1}$                                                                             | <i>C</i> 2/ <i>c</i>                                                                           | <i>P</i> $\bar{1}$                                                                              |
| <i>a</i> , Å               | 12.063(2)                                                                                      | 15.271(2)                                                                                      | 10.581(7)                                                                                       |
| <i>b</i> , Å               | 12.378(2)                                                                                      | 15.552(2)                                                                                      | 11.018(7)                                                                                       |
| <i>c</i> , Å               | 16.823(3)                                                                                      | 21.622(3)                                                                                      | 11.389(13)                                                                                      |
| $\alpha$ , °               | 90.471(2)                                                                                      | 90                                                                                             | 109.060(9)                                                                                      |
| $\beta$ , °                | 94.895(2)                                                                                      | 105.223(2)                                                                                     | 91.661(9)                                                                                       |
| $\gamma$ , °               | 90.773(2)                                                                                      | 90                                                                                             | 118.443(6)                                                                                      |
| <i>V</i> , Å <sup>3</sup>  | 2502.5(8)                                                                                      | 4955.0(12)                                                                                     | 1076.0(15)                                                                                      |
| <i>Z</i>                   | 4                                                                                              | 8                                                                                              | 2                                                                                               |
| <i>R</i> 1( <i>I</i> > 2σ) | 0.0473                                                                                         | 0.0430                                                                                         | 0.1124                                                                                          |
| <i>wR</i> 2(all)           | 0.1264                                                                                         | 0.0962                                                                                         | 0.2919                                                                                          |
| GOF                        | 1.030                                                                                          | 1.055                                                                                          | 1.074                                                                                           |
